# Supplementary material for: CDSeq: A novel complete deconvolution method for dissecting heterogeneous samples using gene expression data
Source: PubMed Central journal article supplement (PMC6907860; doi:10.1371/journal.pcbi.1007510), 2019-12-02
Supplement: pcbi.1007510.s007.pdf [file pcbi.1007510.s007.pdf]

C

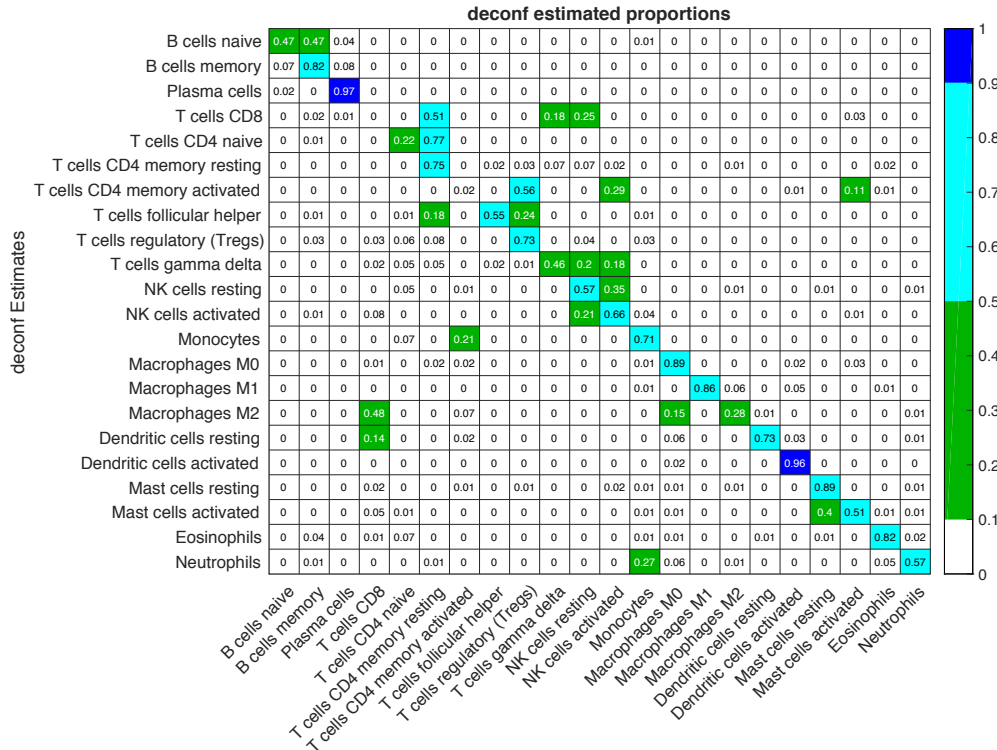

D

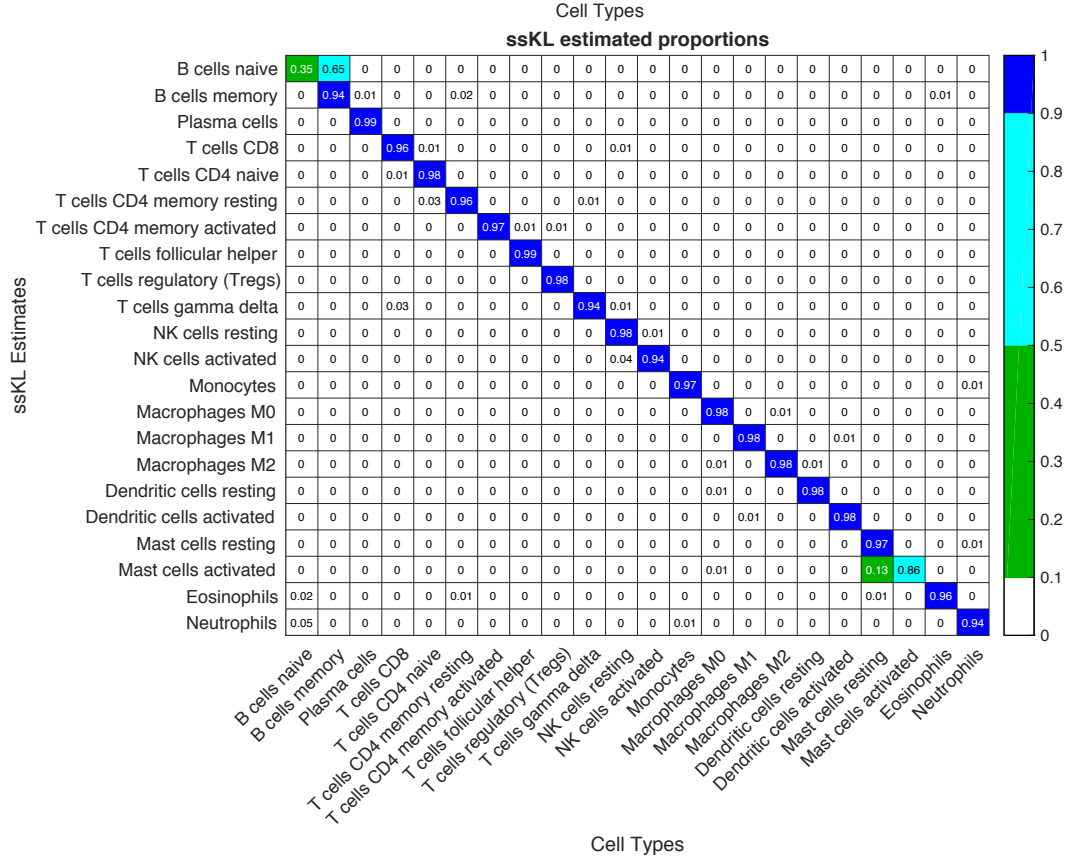

E

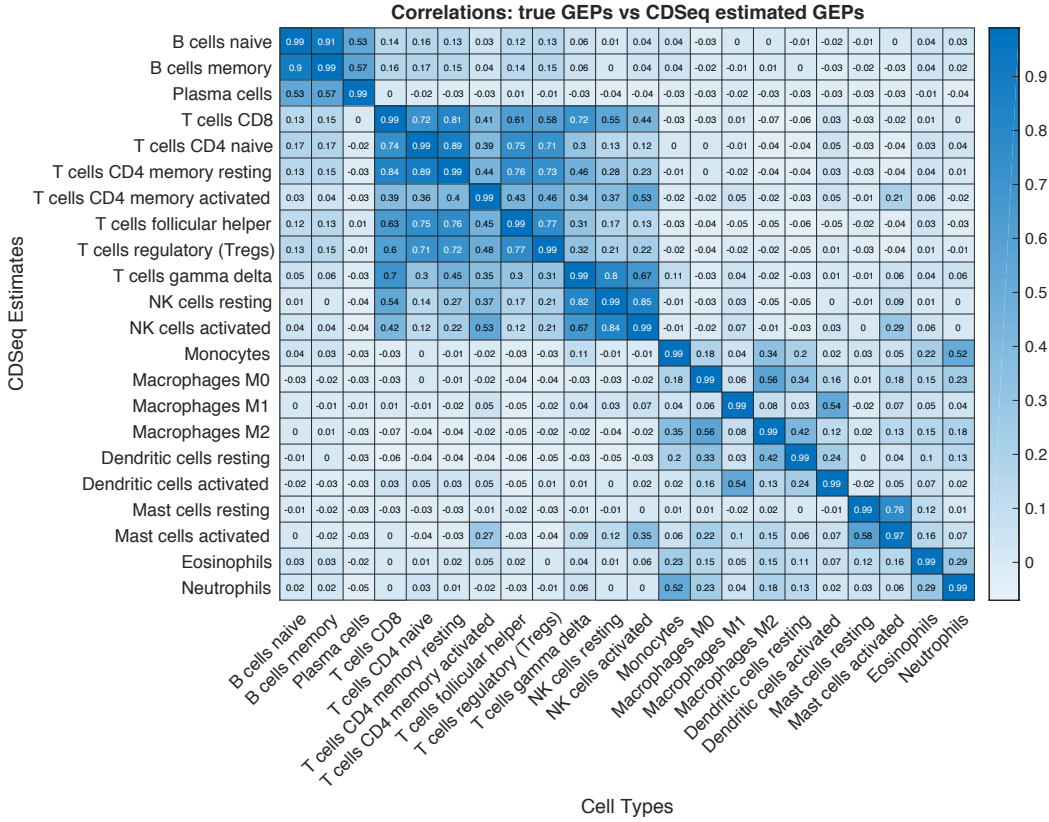

F

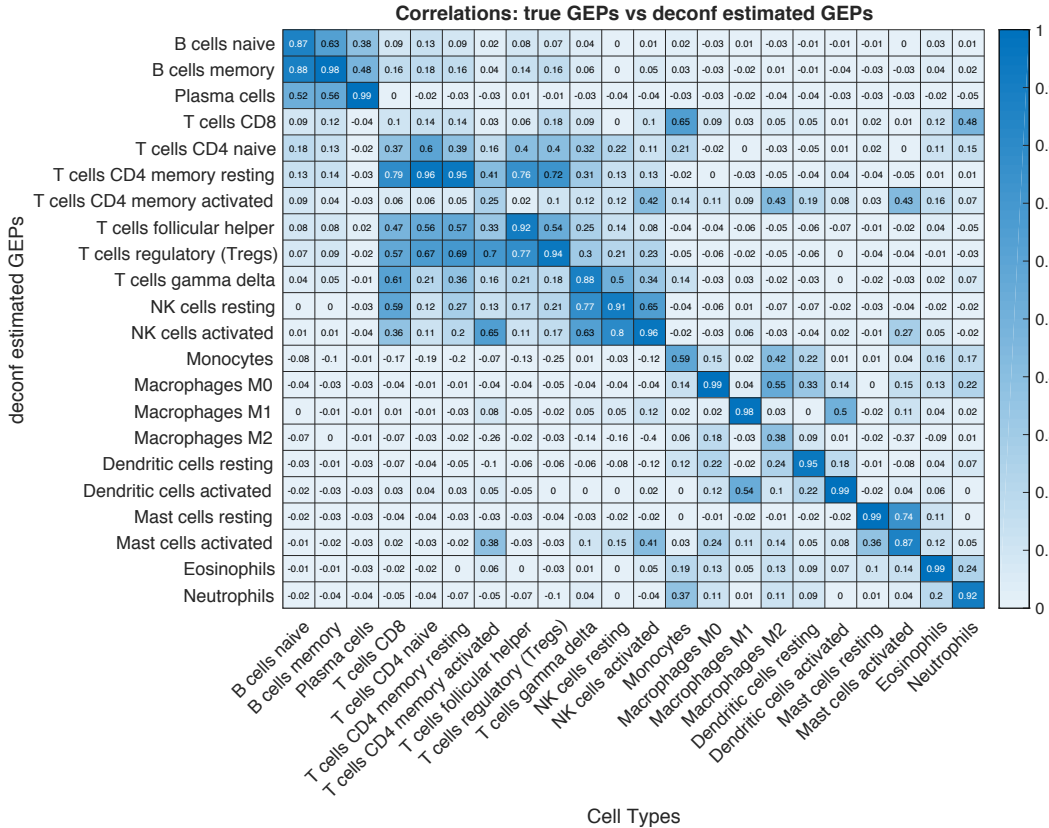

G

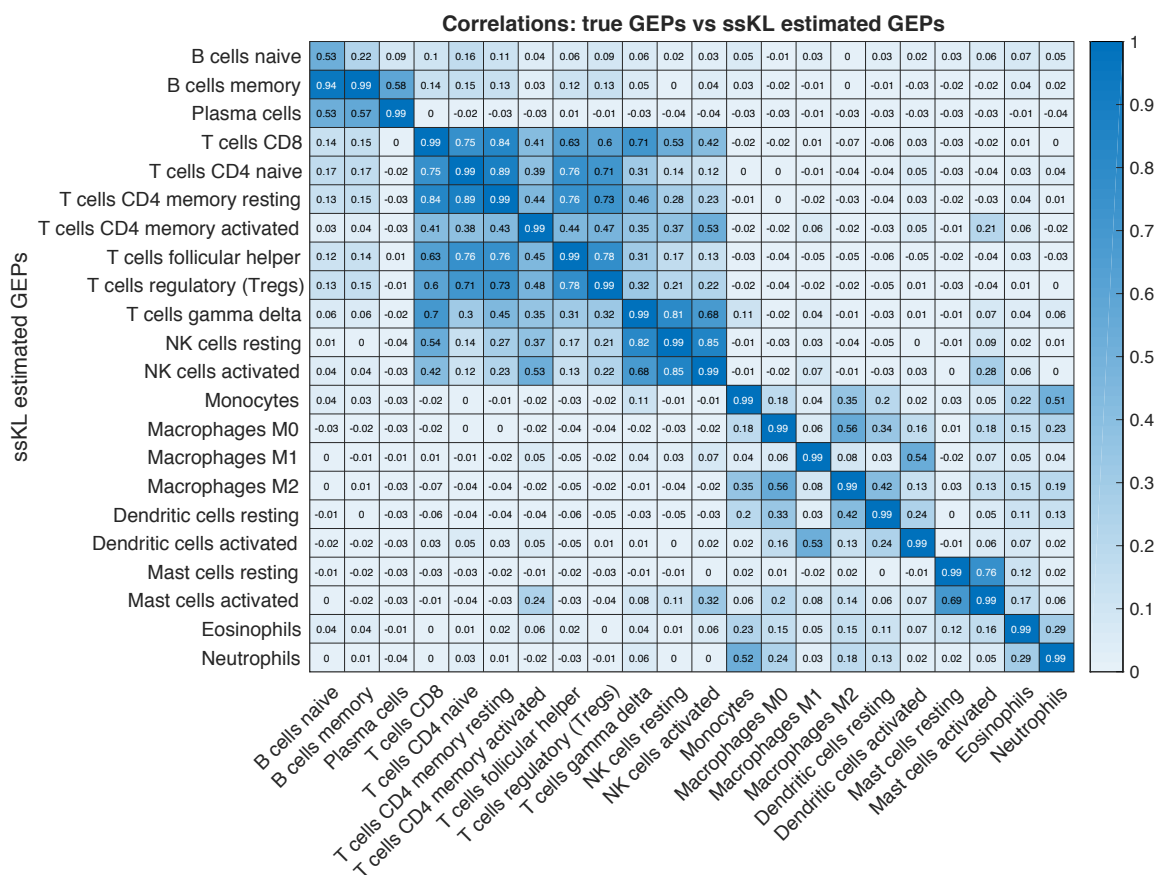

H

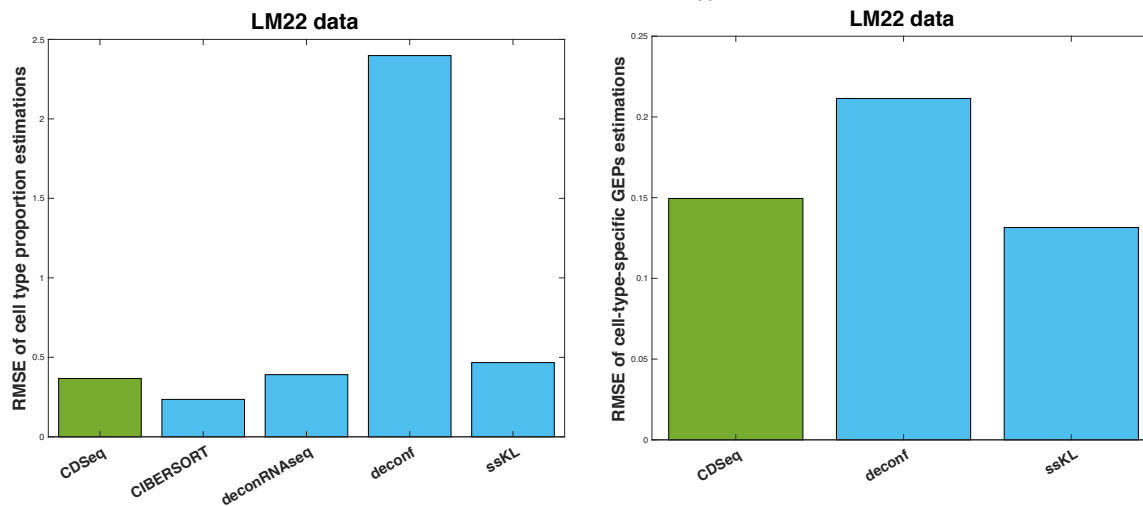

**S4 Fig. Deconvolution of 22 leukocyte subtypes (LM22) data set.** (A) Heatmap of CDSeq-estimated proportions of LM22 dataset. Each column represents a cell type in LM22 and the number at each row denotes the proportion of the corresponding cell type. The sums of proportions along the rows are not always equal to 1 owing to the fact that we rounded off all the proportions to 2 decimal places for better visual presentation. The proportions are largely, but not exclusively, dominated by a single cell type, indicating the accuracy of estimated proportions. (B) Heatmap of CIBERSORT-estimated proportions; (C) Heatmap of deconf-estimated proportions; (D) Heatmap of ssKL-estimated proportions; (E) Correlations of CDSeq-estimated GEPs versus true GEPs; (F) Correlations of deconf-estimated GEPs versus true

GEPs; (G) Correlations of ssKL-estimated GEPs versus true GEPs. (H) RMSEs of SSP estimations (left panel) and RMSEs of csGEPs estimations (right panel).
