# Supplementary material for: CDSeq: A novel complete deconvolution method for dissecting heterogeneous samples using gene expression data
Source: PubMed Central journal article supplement (PMC6907860; doi:10.1371/journal.pcbi.1007510), 2019-12-02
Supplement: pcbi.1007510.s008.pdf [file pcbi.1007510.s008.pdf]

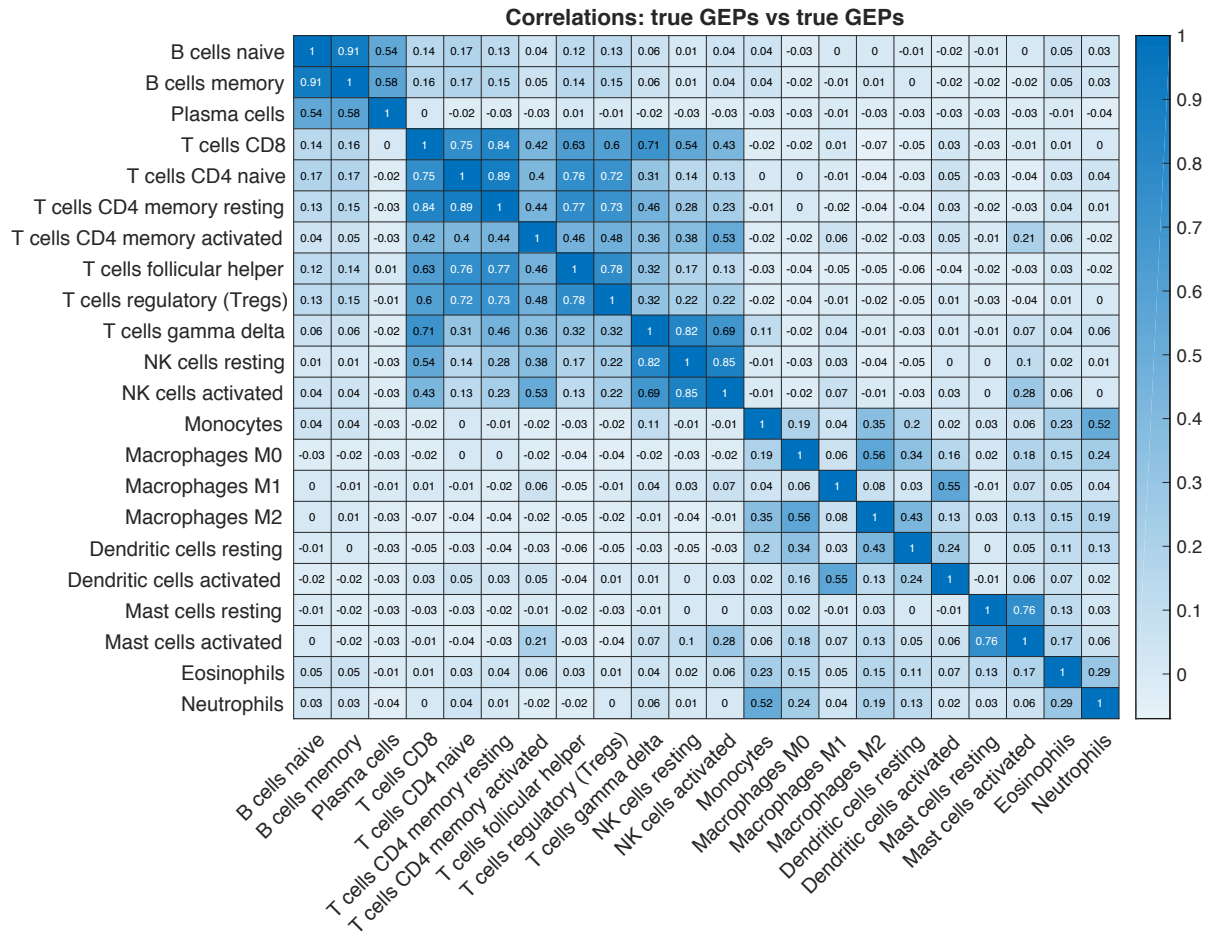

**S5 Fig. Correlation among true LM22 GEPs.** Some of the 22 cell types are highly correlated.
