# Supplementary material for: CDSeq: A novel complete deconvolution method for dissecting heterogeneous samples using gene expression data
Source: PubMed Central journal article supplement (PMC6907860; doi:10.1371/journal.pcbi.1007510), 2019-12-02
Supplement: pcbi.1007510.s009.pdf [file pcbi.1007510.s009.pdf]

## Immune cell analysis of lymphoma data with comparison to flow cytometry

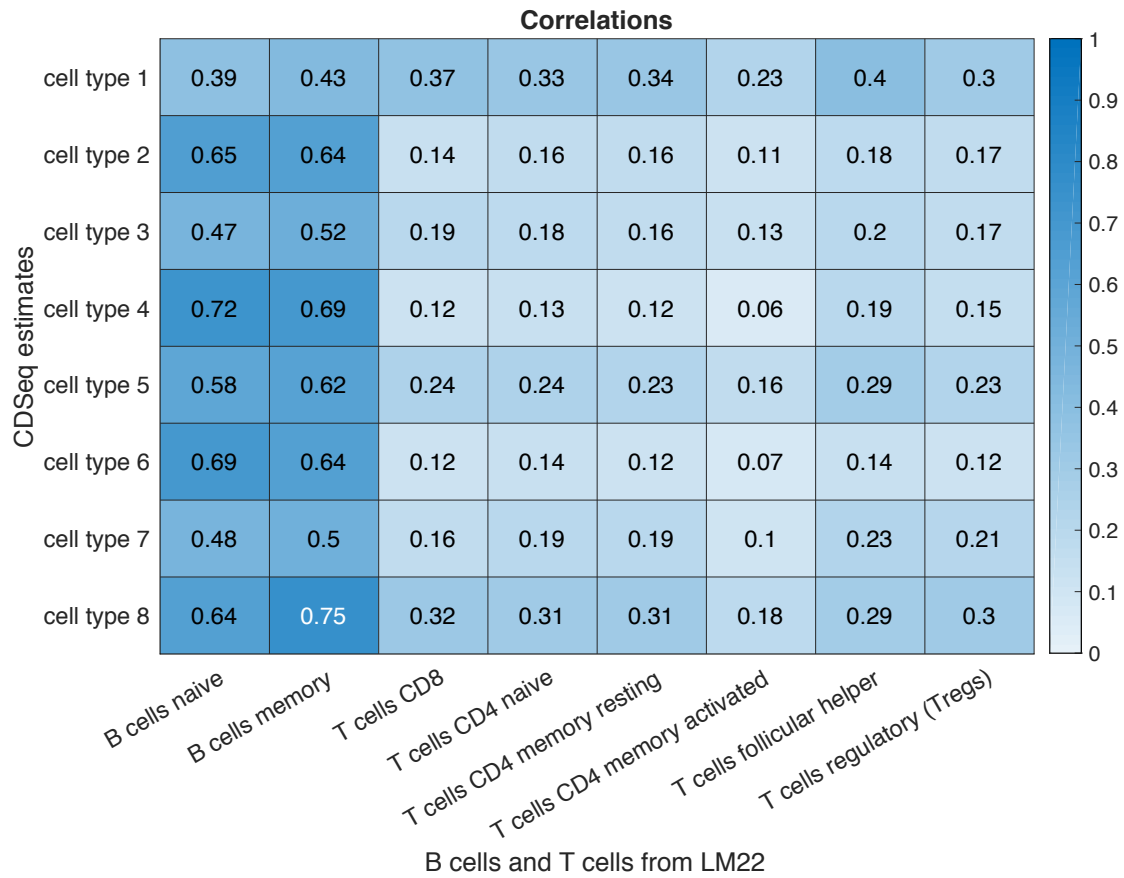

**S6 Fig. Result of deconvolution of follicular lymphoma tumors data.** Heatmap chart of correlations between CDSeq-estimated cell-type-specific GEPs using fully unsupervised mode. We set the number of cell types to be 8, hyperparameters  $\alpha = 5$ ,  $\beta = 0.5$ , and 700 MCMC runs. The 8 CDSeq-identified cell-type-specific GEPs were relatively highly correlated with naïve B cell and memory B cell GEPs but less correlated with the T cell GEPs. In fully unsupervised mode, CDSeq could uncover signals only from B cells.
