# Supplementary material for: CDSeq: A novel complete deconvolution method for dissecting heterogeneous samples using gene expression data
Source: PubMed Central journal article supplement (PMC6907860; doi:10.1371/journal.pcbi.1007510), 2019-12-02
Supplement: pcbi.1007510.s010.pdf [file pcbi.1007510.s010.pdf]

A

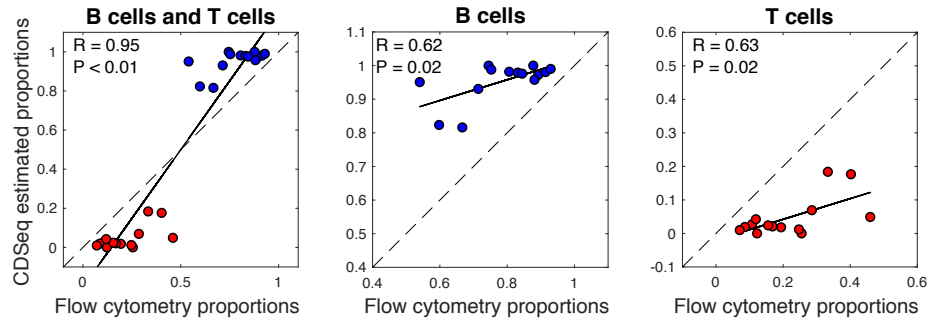

B

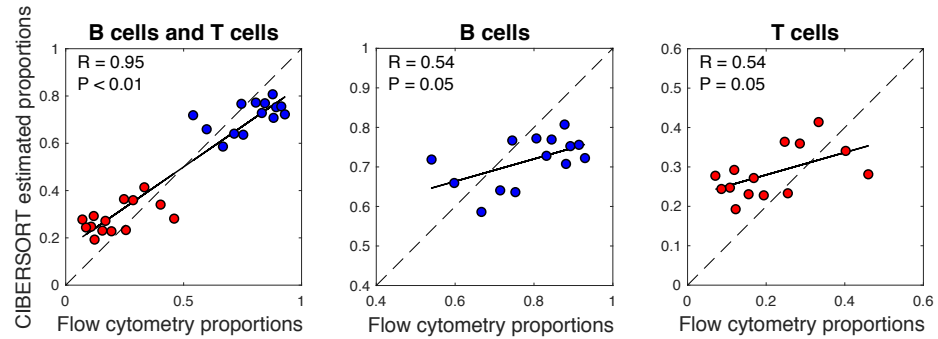

C

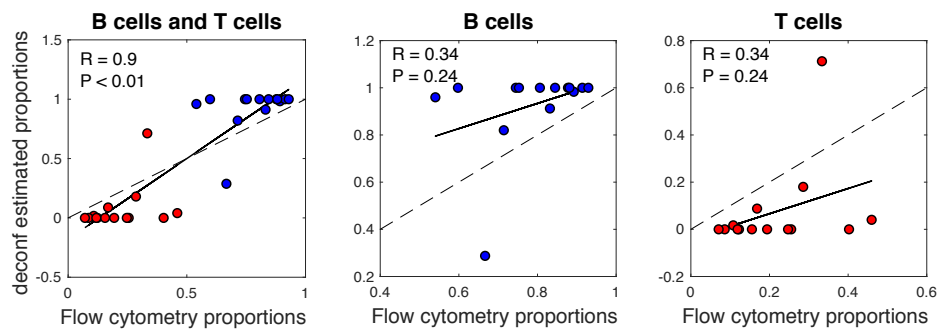

D

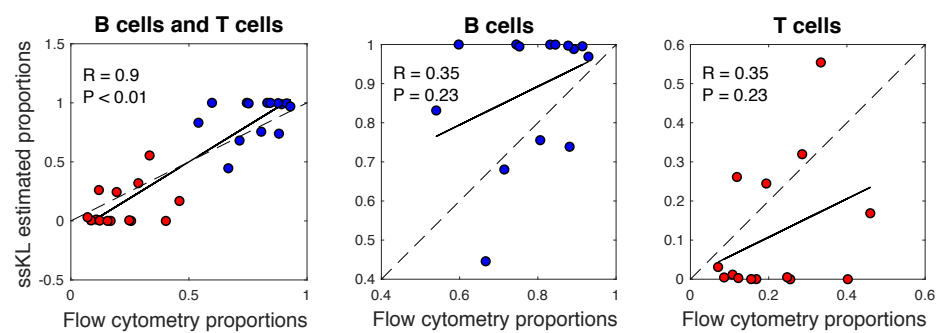

E

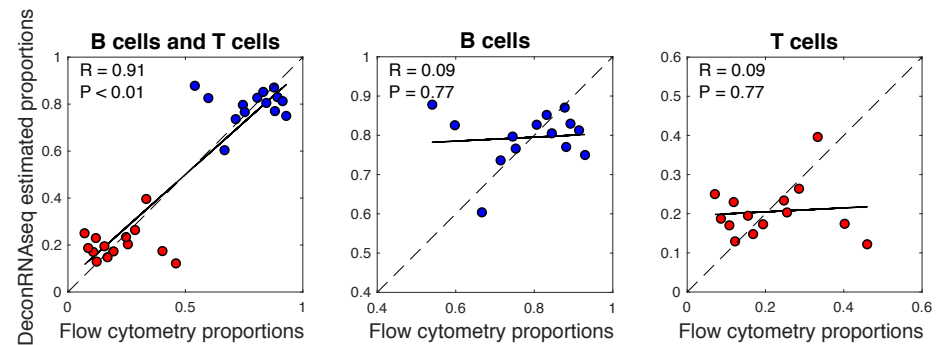

F **Correlations between deconf estimated csGEPs and GEPs of leukocyte subtype**

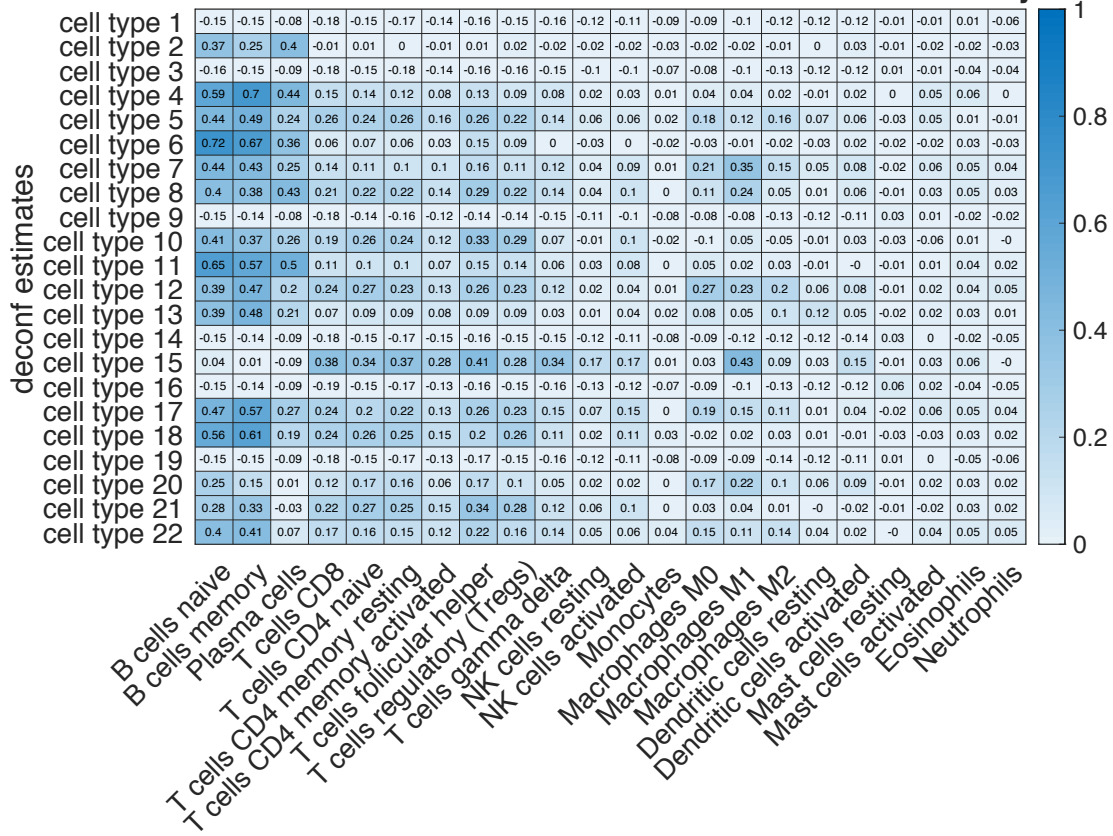

LM22

**G Correlations between ssKL estimated csGEPs and GEPs of leukocyte subtype**

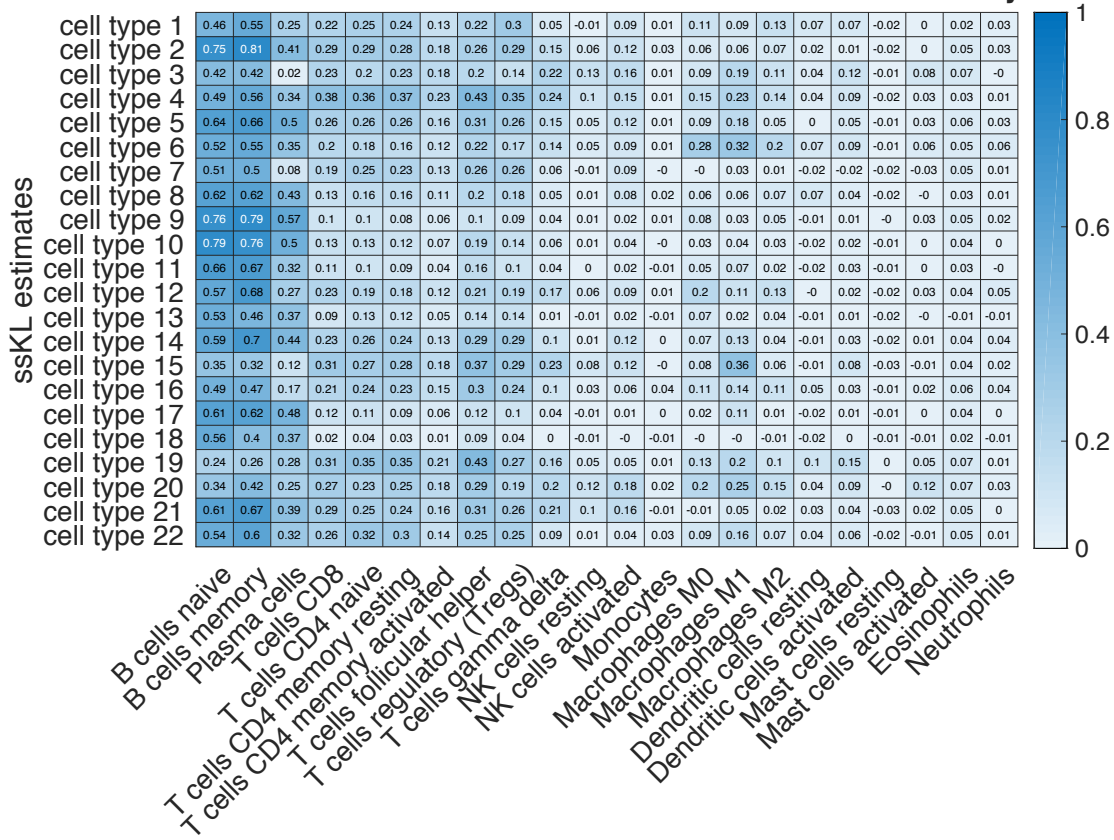

**H**

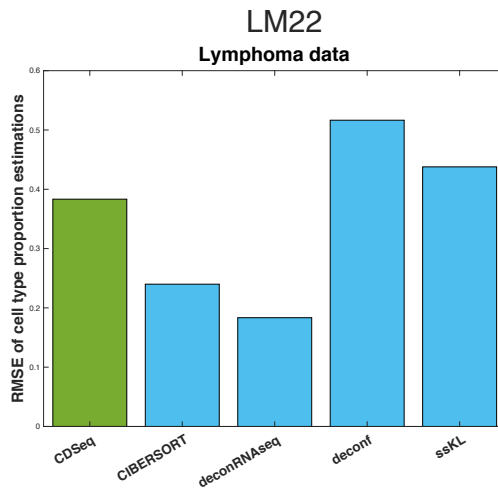

**S7 Fig. Results of deconvolution of 14 follicular lymphoma tumors samples.** We show flow-cytometry measurements versus estimated cell proportions: (A) CDSeq; (B) CIBERSORT; (C) DeconRNAseq; (D) deconf; (E) ssKL. We used 0.6 as a threshold to infer the identities of estimated cell types. We show correlations between estimated csGEPs and the LM22 GEPs: (F) deconf; (G) ssKL; (H) RMSEs of proportion estimations. For deconf and ssKL, we used the cell type with the highest correlation (0.38 and 0.35, respectively) with T cell GEPs as the T cell population.
