# Supplementary material for: CDSeq: A novel complete deconvolution method for dissecting heterogeneous samples using gene expression data
Source: PubMed Central journal article supplement (PMC6907860; doi:10.1371/journal.pcbi.1007510), 2019-12-02
Supplement: pcbi.1007510.s013.pdf [file pcbi.1007510.s013.pdf]

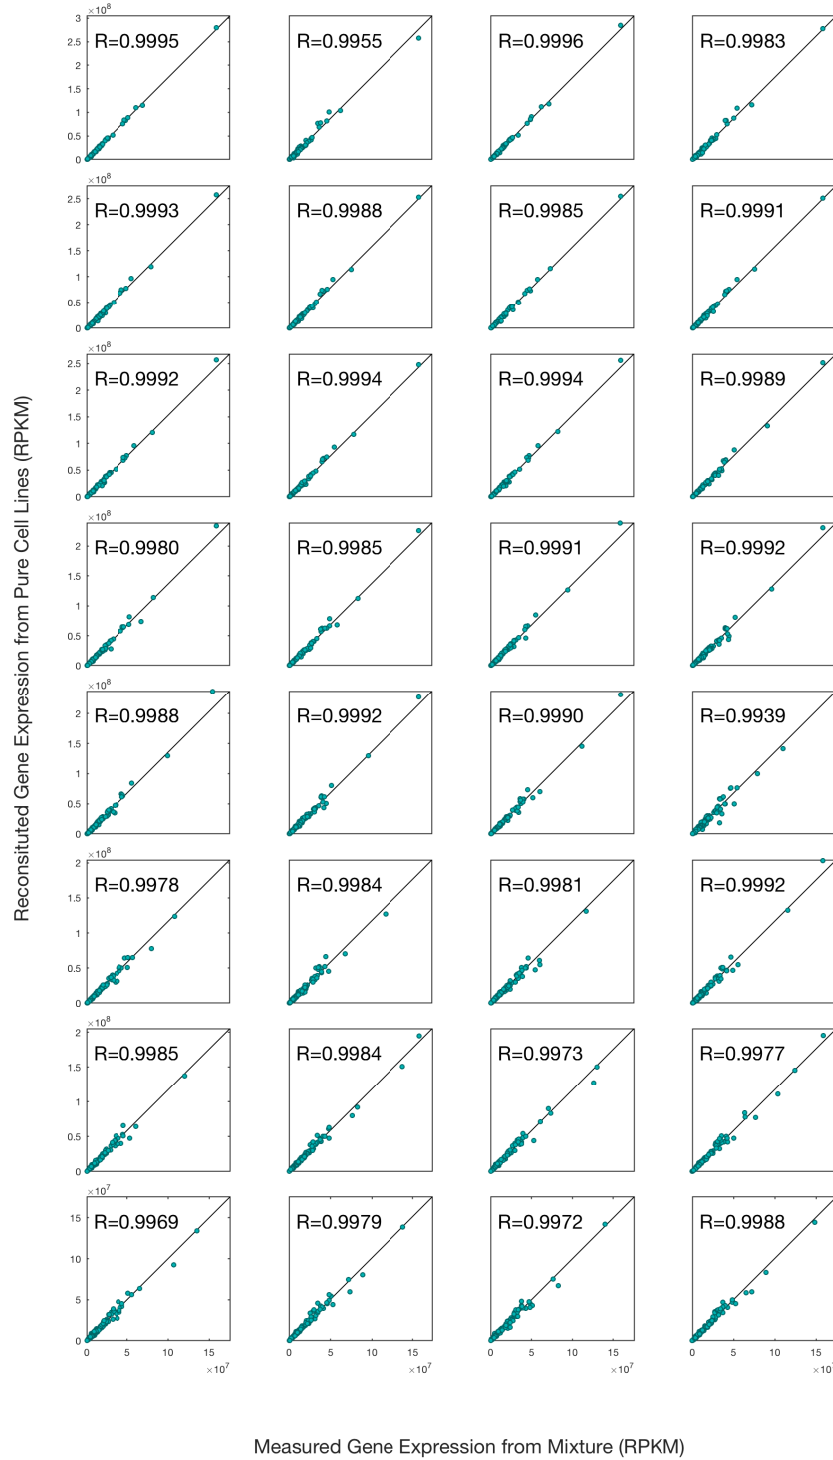

**S10 Fig. Linearity assumption test using 32 experimental mixtures.** We tested the linearity assumption employed by csSAM and other deconvolution methods by comparing the measured RPKMs with the reconstituted RPKMs using known mixing proportions and four pure cell lines. x-axis represents the measured GEP of mixtures (in RPKM) and the y-axis denotes the RPKMs of the reconstituted mixtures.  $R$  denotes the correlation between measured mixtures RPKM and the reconstituted RPKM.
